# Supplementary material
Source: PubMed Central journal article supplement (PMC2075289)
Supplement: jphysiol_2007.130906_1.pdf [file jphysiol_2007.130906_1.pdf]

## Errata

Oliver J. Mace, Julie Affleck, Nick Patel and George L. Kellett

*Department of Biology (Area 3), The University of York, York YO10 5YW, UK*

The paper by Mace *et al.* contains two errors on page 389. On line 43 “sucralose > acesulfame potassium ~ saccharin” was written incorrectly and should read “sucralose ~ acesulfame potassium > saccharin”. On line 28 “cholecystokinin” was incorrectly written as “cholecystokinic”.

The sentence beginning on line 30 of the Discussion page 389 should read: “By contrast, the classic amino acid taste receptor components, T1R1 and transducin, and also PLC  $\beta_2$ , behave reciprocally.”

The publishers wish to apologize for these errors.

### References

Oliver J. Mace, Julie Affleck, Nick Patel & George L. Kellett (2007). Sweet taste receptors in rat small intestine stimulate glucose absorption through apical GLUT2. *J Physiol* **582**, 379–392.
